# Supplementary material
Source: ML conference proceedings conference paper supplement (https://openreview.net/forum?id=akeVfjnPfTS)
Supplement: supplementary_material [file attachment]

 controllable agents  teammates  apple

a

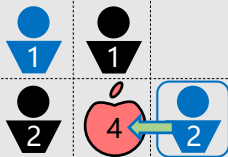

intend to  
reach out

b

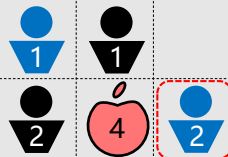

leave the team  
accidentally

c

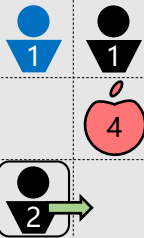

recognize  
& adjust

d

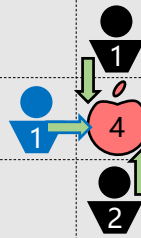

reach out
