# Supplementary material
Source: ML conference proceedings conference paper supplement (https://openreview.net/forum?id=akeVfjnPfTS)
Supplement: supplementary_material [file attachment]

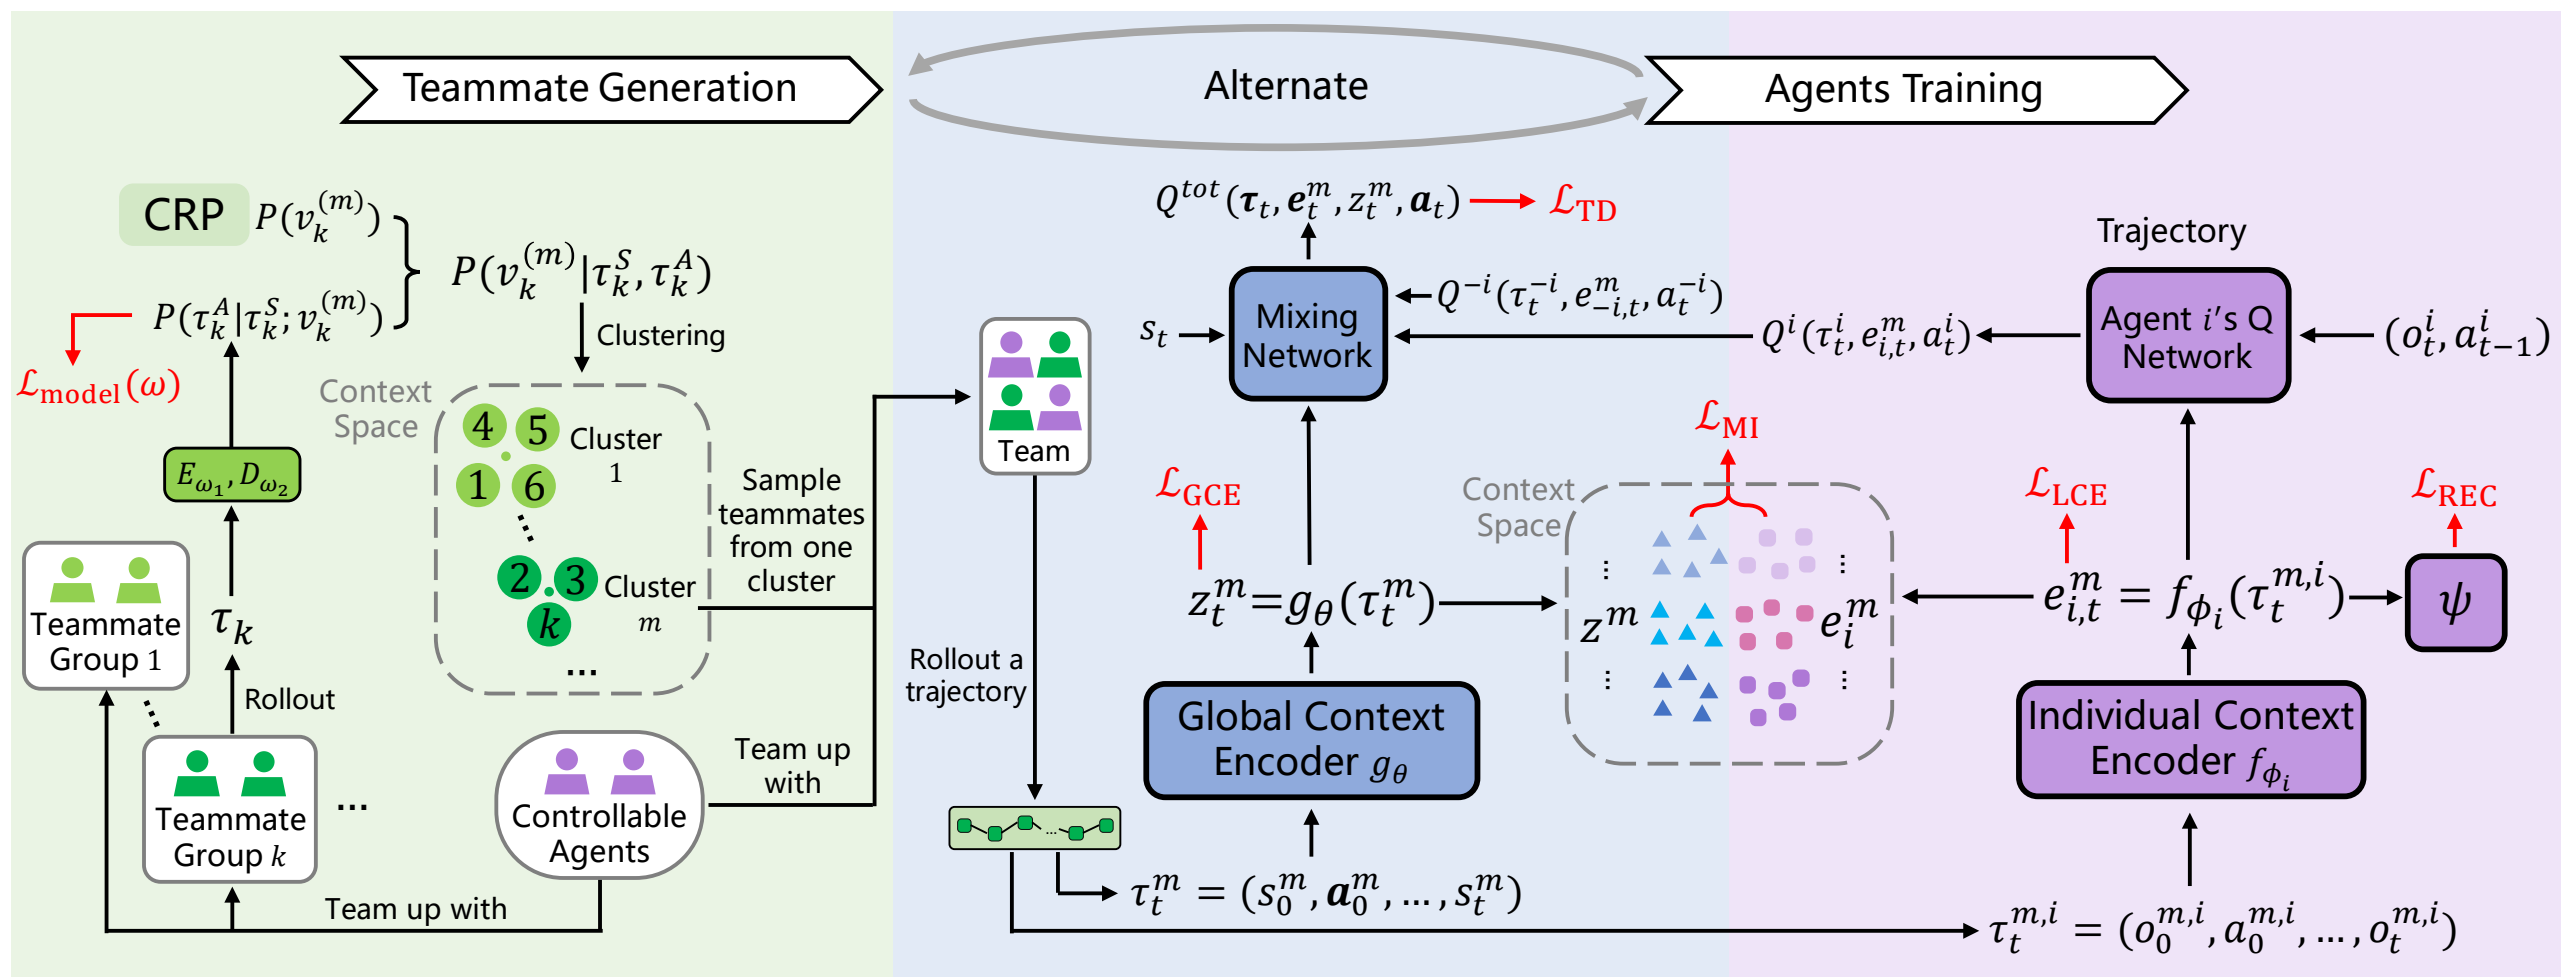

(a) CRP-Based Infinite Mixture for Dynamic Teammate Generation

(b) Centralized Contextualization Learning for Fast Adaptation

(c) Decentralized Team Situation Recognition
