# Supplementary material
Source: ML conference proceedings conference paper supplement (https://openreview.net/forum?id=akeVfjnPfTS)
Supplement: supplementary_material [file attachment]

 controllable agents
  teammates
  apple

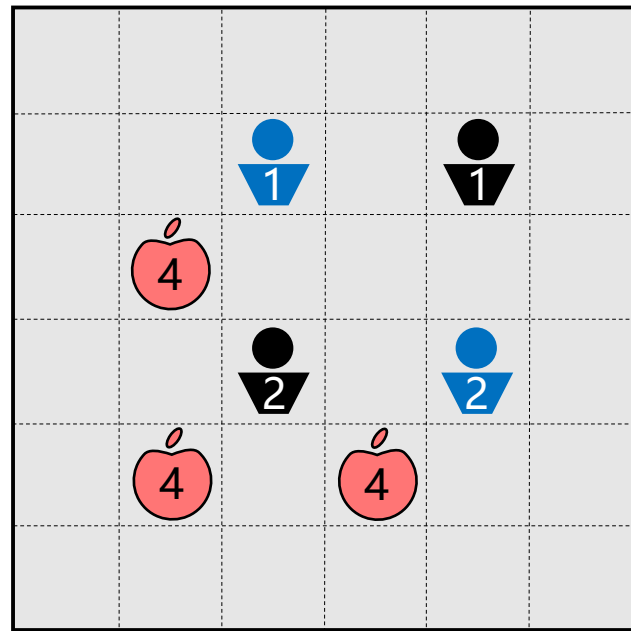

(a) LBF

 controllable agents
  teammates  
 prey
  obstacles

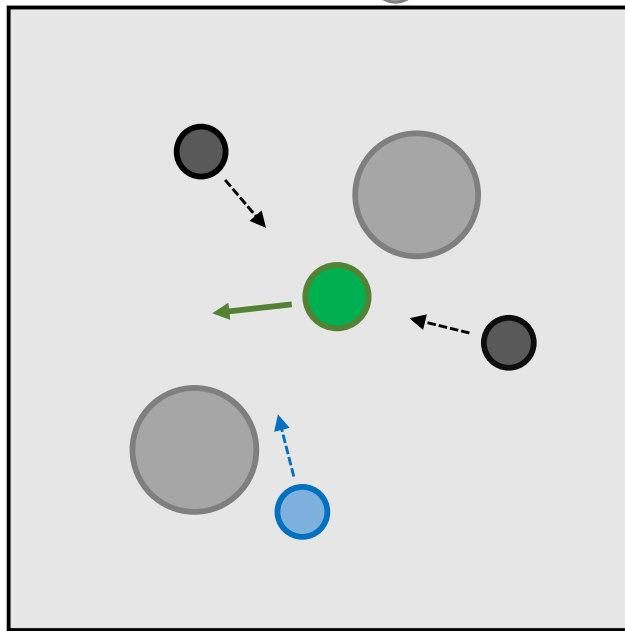

(b) PP

 controllable agents
  teammates  
 landmarks

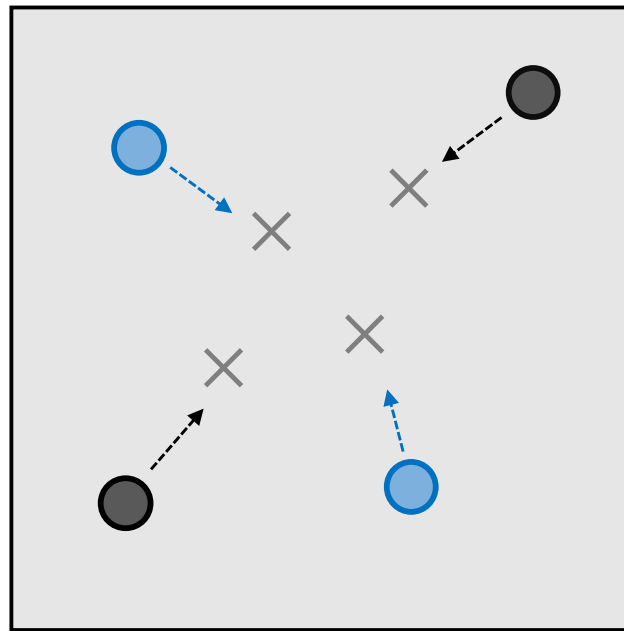

(c) CN

 controllable agents
  teammates  
 enemies

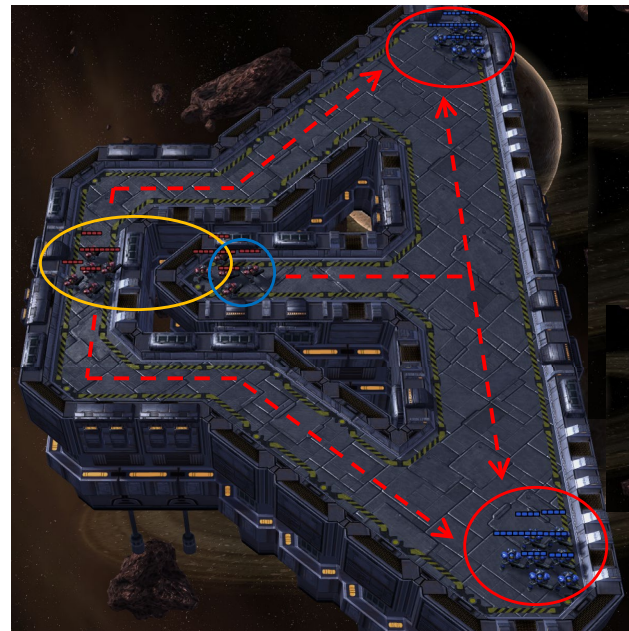

(d) 10m\_vs\_14m
