# Supplementary material
Source: ML conference proceedings conference paper supplement (https://openreview.net/forum?id=akeVfjnPfTS)
Supplement: supplementary_material [file attachment]

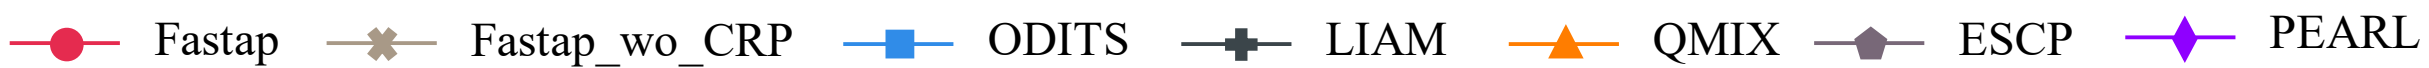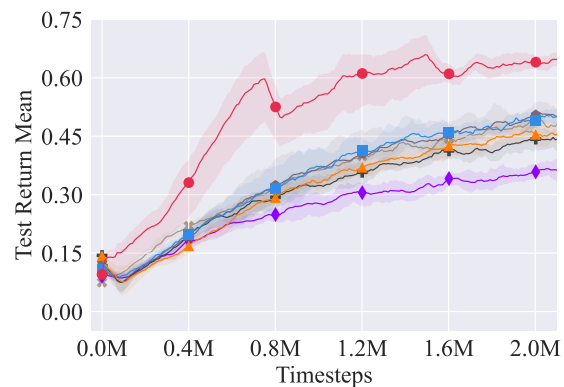

(a) LBF (stationary)

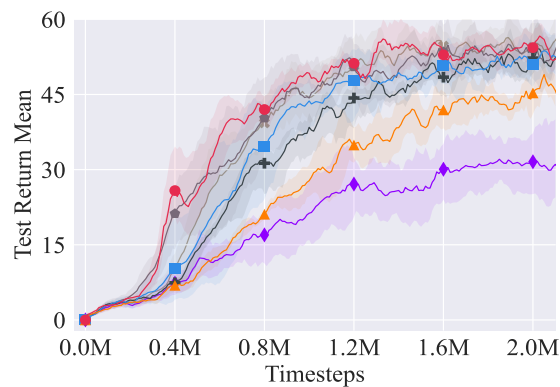

(b) SimpleTag (stationary)

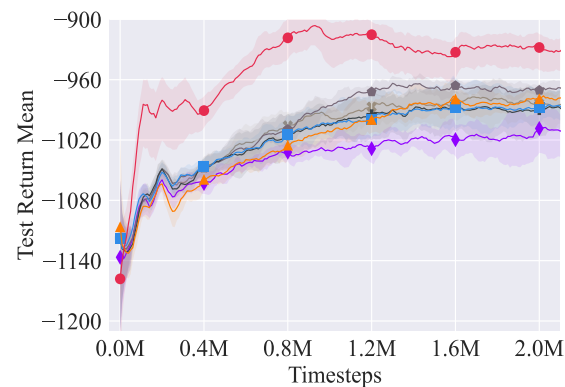

(c) SimpleSpread (stationary)

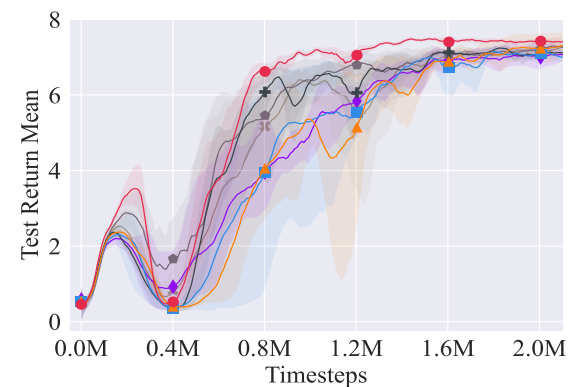

(d) SMAC (stationary)

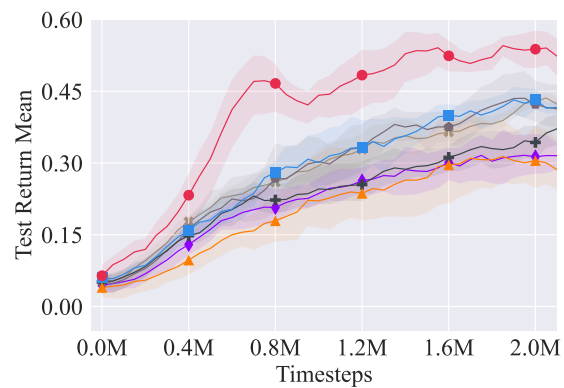

(e) LBF (changing)

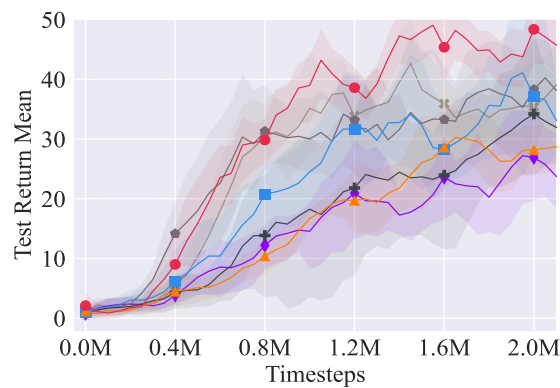

(f) SimpleTag (changing)

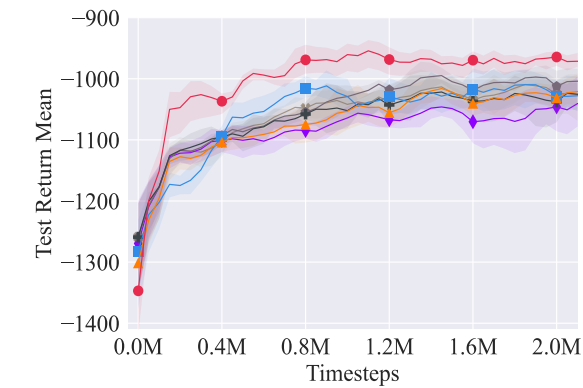

(g) SimpleSpread (changing)

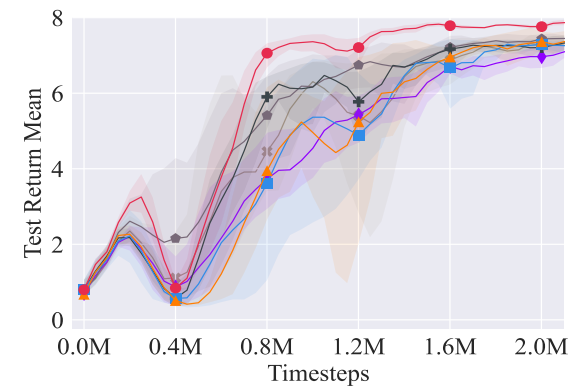

(h) SMAC (changing)
